# Supplementary material
Source: HighWire-hosted journal article supplement (https://gut.bmj.com/content/69/1/4)

Guimarães *et al.* Computer-aided diagnosis of atrophic gastritis

### Supplementary Figure 1: Performance curves

Receiving operating characteristics (ROC) curves for datasets 1 (DS1) and 2 (DS2) are shown in a) and b), respectively. The area under the curves (AUC) were 0.984 for DS1 and 0.981 for DS2. The average result of the endoscopists (sensitivity = 0.800; specificity = 0.800) is marked in red in b). The performance metrics accuracy, PPV and NPV were extrapolated from the results on DS2 to infer on performance changes with prevalence rates (20% - 50%). The resulting curves are shown in c).

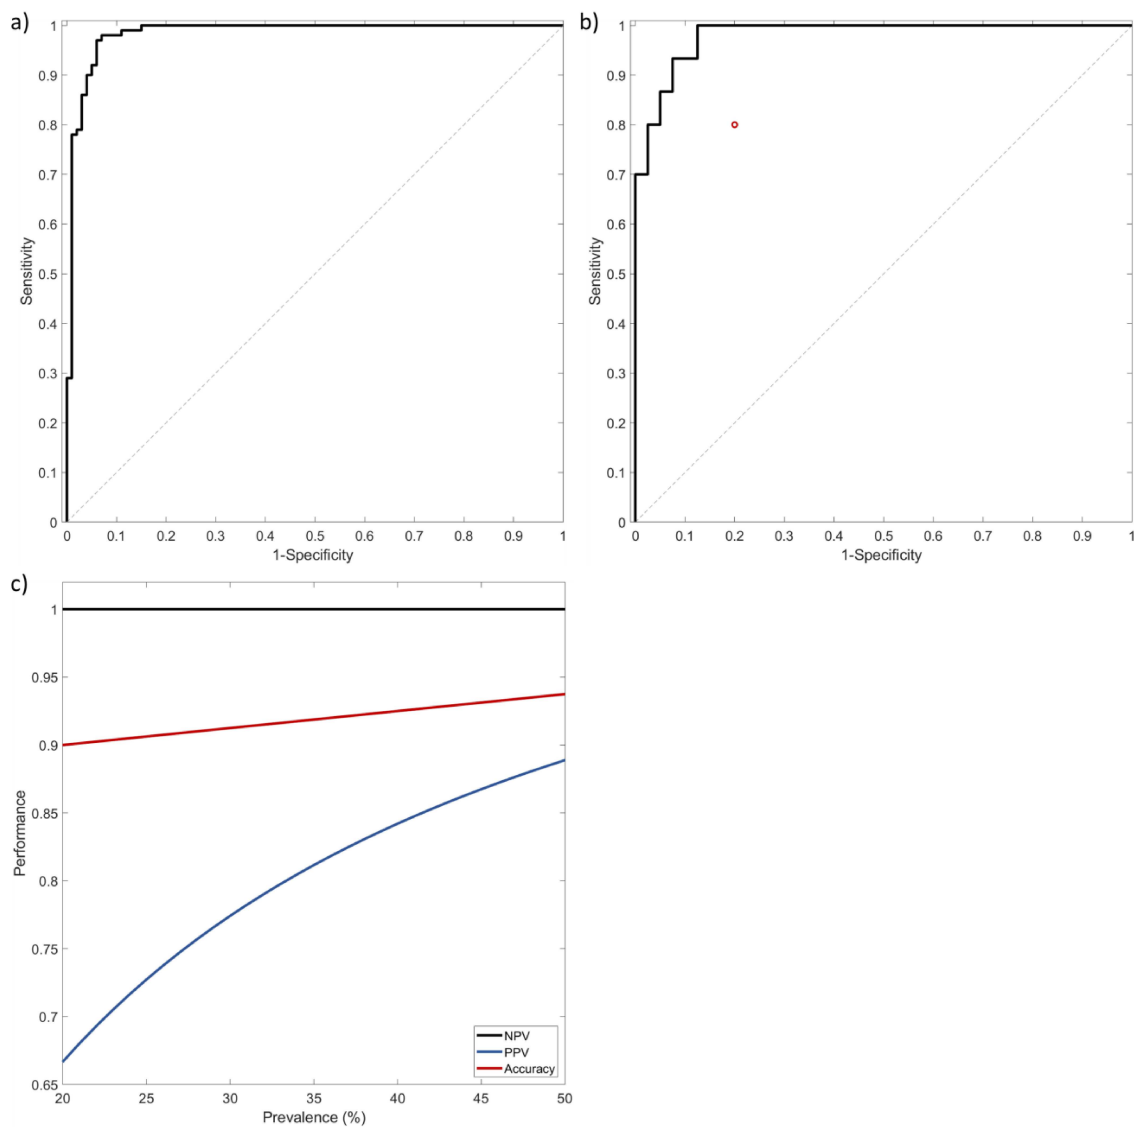

Supplement: inline-supplementary-material-2 [file inline-supplementary-material-2.pdf]
